# Supplementary material for: Pentacoordinated germanium in AST zeolite synthesised in fluoride media. A 19F NMR validated computational study
Source: Royal Society of Chemistry journal article supplement (doi:10.1039/b419131e), 2005-01-01
Supplement: b419131e.pdf [file b419131e.pdf]

### Supplementary information

**Table S1.** Cell parameters and atomic coordinates of the optimised cell AST zeolite framework type of composition [DABCOH,F]<sub>2</sub>-Si<sub>20</sub>O<sub>40</sub>, where DABCOH is protonated 1,4-diazabicyclo [2.2.2] octane. The forcefield in [14] was used for the optimisation. C2 is secondary carbon, N3 is tertiary nitrogen and N4 is quaternary nitrogen. O2 is oxygen in Si-O-Si bridges.

---

| CELL PARAMETERS |          |           |           |           |           |
|-----------------|----------|-----------|-----------|-----------|-----------|
| 8.977609        | 8.972038 | 13.504335 | 89.888547 | 90.215739 | 90.271662 |
| ATOM            | X        | Y         | Z         |           |           |
| Si1             | 0.22763  | 0.05076   | 0.10271   |           |           |
| Si1             | 0.75732  | 0.95269   | 0.10387   |           |           |
| Si1             | 0.94572  | 0.23414   | 0.10445   |           |           |
| Si1             | 0.04035  | 0.76964   | 0.10313   |           |           |
| Si1             | 0.75820  | 0.95511   | 0.88011   |           |           |
| Si1             | 0.22953  | 0.05208   | 0.87913   |           |           |
| Si1             | 0.04108  | 0.77047   | 0.88005   |           |           |
| Si1             | 0.94743  | 0.23600   | 0.87938   |           |           |
| Si1             | 0.72912  | 0.54718   | 0.60326   |           |           |
| Si1             | 0.25787  | 0.45208   | 0.60432   |           |           |
| Si1             | 0.44781  | 0.73433   | 0.60427   |           |           |
| Si1             | 0.54045  | 0.26583   | 0.60291   |           |           |
| Si1             | 0.25879  | 0.45820   | 0.38023   |           |           |
| Si1             | 0.72822  | 0.55019   | 0.37918   |           |           |
| Si1             | 0.53882  | 0.27237   | 0.37930   |           |           |
| Si1             | 0.44874  | 0.73673   | 0.38023   |           |           |
| Si2             | 0.49308  | 0.00403   | 0.24185   |           |           |
| Si2             | 0.99390  | 0.50239   | 0.24099   |           |           |
| Si2             | 0.49314  | 0.00112   | 0.74127   |           |           |
| Si2             | 0.99465  | 0.50315   | 0.74266   |           |           |
| C2              | 0.04695  | 0.95110   | 0.56104   |           |           |
| N3              | 0.08092  | 0.09007   | 0.50262   |           |           |
| C2              | 0.93839  | 0.16527   | 0.47237   |           |           |
| C2              | 0.84705  | 0.05826   | 0.40726   |           |           |
| N4              | 0.92775  | 0.91206   | 0.39524   |           |           |
| C2              | 0.95349  | 0.84490   | 0.49664   |           |           |
| C2              | 0.16830  | 0.04952   | 0.41189   |           |           |
| C2              | 0.07625  | 0.94289   | 0.34733   |           |           |
| H               | 0.86503  | 0.83982   | 0.35084   |           |           |
| H               | 0.15160  | 0.89843   | 0.58455   |           |           |
| H               | 0.98731  | 0.98056   | 0.62910   |           |           |
| H               | 0.87567  | 0.19774   | 0.53855   |           |           |
| H               | 0.96486  | 0.26891   | 0.43248   |           |           |
| H               | 0.73799  | 0.03716   | 0.44119   |           |           |
| H               | 0.82690  | 0.10942   | 0.33434   |           |           |
| H               | 0.00837  | 0.73602   | 0.49036   |           |           |
| H               | 0.84590  | 0.82505   | 0.53265   |           |           |
| H               | 0.19490  | 0.14960   | 0.36872   |           |           |
| H               | 0.27415  | 0.99937   | 0.43513   |           |           |
| H               | 0.13837  | 0.83987   | 0.33312   |           |           |
| H               | 0.05569  | 0.99539   | 0.27532   |           |           |
| C2              | 0.61341  | 0.58923   | 0.11963   |           |           |
| N3              | 0.61867  | 0.65428   | 0.01694   |           |           |
| C2              | 0.46303  | 0.68958   | 0.98273   |           |           |
| C2              | 0.36832  | 0.54648   | 0.98483   |           |           |

# Supplementary Material (ESI) for Chemical Communications  
# This journal is © The Royal Society of Chemistry 2005

|    |         |         |         |
|----|---------|---------|---------|
| N4 | 0.46337 | 0.41503 | 0.01520 |
| C2 | 0.52471 | 0.44260 | 0.11811 |
| C2 | 0.68838 | 0.54410 | 0.94730 |
| C2 | 0.59238 | 0.40200 | 0.94418 |
| H  | 0.40023 | 0.31694 | 0.01434 |
| H  | 0.72726 | 0.57080 | 0.14617 |
| H  | 0.56353 | 0.66947 | 0.17084 |
| H  | 0.41535 | 0.77588 | 0.03056 |
| H  | 0.46706 | 0.73735 | 0.90780 |
| H  | 0.27584 | 0.55898 | 0.03716 |
| H  | 0.31729 | 0.52791 | 0.91173 |
| H  | 0.59750 | 0.35044 | 0.14119 |
| H  | 0.43359 | 0.44719 | 0.17211 |
| H  | 0.69910 | 0.59320 | 0.87300 |
| H  | 0.80214 | 0.51879 | 0.97241 |
| H  | 0.65988 | 0.30488 | 0.96442 |
| H  | 0.55171 | 0.38236 | 0.86848 |
| F  | 0.99870 | 0.00029 | 0.99402 |
| F  | 0.49841 | 0.50155 | 0.48511 |
| O2 | 0.36943 | 0.08260 | 0.17356 |
| O2 | 0.61584 | 0.92346 | 0.17474 |
| O2 | 0.91413 | 0.37913 | 0.17219 |
| O2 | 0.07274 | 0.62625 | 0.17251 |
| O2 | 0.61515 | 0.92211 | 0.81119 |
| O2 | 0.37251 | 0.08204 | 0.81038 |
| O2 | 0.07267 | 0.62744 | 0.81139 |
| O2 | 0.91432 | 0.38309 | 0.81391 |
| O2 | 0.87192 | 0.58083 | 0.67238 |
| O2 | 0.11705 | 0.42359 | 0.67493 |
| O2 | 0.41486 | 0.87574 | 0.67375 |
| O2 | 0.57264 | 0.12296 | 0.67149 |
| O2 | 0.11501 | 0.42430 | 0.31169 |
| O2 | 0.86983 | 0.58167 | 0.30874 |
| O2 | 0.57067 | 0.12934 | 0.31010 |
| O2 | 0.41544 | 0.88129 | 0.31225 |
| O2 | 0.29400 | 0.06367 | 0.99172 |
| O2 | 0.69565 | 0.95669 | 0.99193 |
| O2 | 0.92498 | 0.29531 | 0.99218 |
| O2 | 0.06208 | 0.70543 | 0.99190 |
| O2 | 0.79324 | 0.56636 | 0.49103 |
| O2 | 0.19612 | 0.44395 | 0.49154 |
| O2 | 0.43517 | 0.79915 | 0.49203 |
| O2 | 0.55550 | 0.20492 | 0.49011 |
| O2 | 0.17216 | 0.88455 | 0.13528 |
| O2 | 0.81858 | 0.11694 | 0.13837 |
| O2 | 0.11388 | 0.18241 | 0.13298 |
| O2 | 0.87389 | 0.82218 | 0.13257 |
| O2 | 0.81889 | 0.11924 | 0.84746 |
| O2 | 0.17148 | 0.88635 | 0.84959 |
| O2 | 0.87261 | 0.82196 | 0.85428 |
| O2 | 0.11570 | 0.18572 | 0.85350 |
| O2 | 0.67488 | 0.37987 | 0.63007 |
| O2 | 0.31623 | 0.61895 | 0.63115 |
| O2 | 0.61433 | 0.67798 | 0.63191 |
| O2 | 0.37713 | 0.32506 | 0.63230 |
| O2 | 0.31434 | 0.62464 | 0.34943 |
| O2 | 0.67407 | 0.38328 | 0.34829 |
| O2 | 0.37392 | 0.32841 | 0.34742 |
| O2 | 0.61415 | 0.68202 | 0.34774 |

---

**Table S2.** Cell parameters and atomic coordinates of the optimised cell AST zeolite framework type of composition [DABCOH,F]<sub>2</sub>-Si<sub>19</sub>Ge<sub>1</sub>O<sub>40</sub>, where DABCOH is protonated 1,4-diazabicyclo [2.2.2] octane. The forcefield in [14] was used for the optimisation. C2 is secondary carbon, N3 is tertiary nitrogen and N4 is quaternary nitrogen. O2 and O3 are oxygens in Si-O-Si and Si-O-Ge bridges respectively

---

| CELL PARAMETERS |          |          |           |           |           |           |
|-----------------|----------|----------|-----------|-----------|-----------|-----------|
|                 | 8.828761 | 9.005639 | 13.590707 | 89.875825 | 91.319808 | 90.787176 |
| ATOM            | X        | Y        | Z         |           |           |           |
| Si1             | 0.22763  | 0.05076  | 0.10271   |           |           |           |
| Si1             | 0.75410  | 0.94676  | 0.10416   |           |           |           |
| Si1             | 0.94183  | 0.23080  | 0.09966   |           |           |           |
| Si1             | 0.04207  | 0.76679  | 0.10287   |           |           |           |
| Si1             | 0.74755  | 0.94437  | 0.88186   |           |           |           |
| Si1             | 0.22006  | 0.04770  | 0.88116   |           |           |           |
| Si1             | 0.03542  | 0.76112  | 0.88040   |           |           |           |
| Si1             | 0.93451  | 0.23055  | 0.87582   |           |           |           |
| Ge1             | 0.70662  | 0.54675  | 0.59471   |           |           |           |
| Si1             | 0.25082  | 0.44398  | 0.60606   |           |           |           |
| Si1             | 0.43681  | 0.73742  | 0.60795   |           |           |           |
| Si1             | 0.54414  | 0.25735  | 0.61016   |           |           |           |
| Si1             | 0.25465  | 0.44821  | 0.38086   |           |           |           |
| Si1             | 0.73972  | 0.55302  | 0.37790   |           |           |           |
| Si1             | 0.54662  | 0.26414  | 0.38380   |           |           |           |
| Si1             | 0.44624  | 0.73561  | 0.38087   |           |           |           |
| Si2             | 0.49441  | 0.00058  | 0.24393   |           |           |           |
| Si2             | 0.99371  | 0.49838  | 0.23457   |           |           |           |
| Si2             | 0.47890  | 0.99366  | 0.74388   |           |           |           |
| Si2             | 0.98178  | 0.49958  | 0.73966   |           |           |           |
| C2              | 0.09953  | 0.09414  | 0.62334   |           |           |           |
| N3              | 0.10638  | 0.15251  | 0.51968   |           |           |           |
| C2              | 0.94785  | 0.17832  | 0.48091   |           |           |           |
| C2              | 0.85585  | 0.03271  | 0.48749   |           |           |           |
| N4              | 0.95750  | 0.90776  | 0.52109   |           |           |           |
| C2              | 0.01953  | 0.94196  | 0.62335   |           |           |           |
| C2              | 0.18362  | 0.04114  | 0.45594   |           |           |           |
| C2              | 0.08812  | 0.89737  | 0.45183   |           |           |           |
| H               | 0.89708  | 0.80750  | 0.52180   |           |           |           |
| H               | 0.21443  | 0.08668  | 0.65476   |           |           |           |
| H               | 0.03949  | 0.17218  | 0.66989   |           |           |           |
| H               | 0.89558  | 0.26606  | 0.52408   |           |           |           |
| H               | 0.95190  | 0.21902  | 0.40470   |           |           |           |
| H               | 0.76420  | 0.04422  | 0.54013   |           |           |           |
| H               | 0.80147  | 0.00784  | 0.41576   |           |           |           |
| H               | 0.10012  | 0.85649  | 0.64763   |           |           |           |
| H               | 0.92779  | 0.94116  | 0.67669   |           |           |           |
| H               | 0.19945  | 0.08609  | 0.38158   |           |           |           |
| H               | 0.29745  | 0.01935  | 0.48673   |           |           |           |
| H               | 0.15751  | 0.80175  | 0.47268   |           |           |           |
| H               | 0.04580  | 0.87713  | 0.37635   |           |           |           |
| C2              | 0.60451  | 0.58406  | 0.11516   |           |           |           |
| N3              | 0.60642  | 0.64698  | 0.01256   |           |           |           |
| C2              | 0.44693  | 0.67923  | 0.97818   |           |           |           |
| C2              | 0.35162  | 0.53540  | 0.98166   |           |           |           |
| N4              | 0.45023  | 0.40661  | 0.01249   |           |           |           |
| C2              | 0.51573  | 0.43638  | 0.11453   |           |           |           |
| C2              | 0.67622  | 0.53709  | 0.94424   |           |           |           |
| C2              | 0.57888  | 0.39443  | 0.94170   |           |           |           |

# Supplementary Material (ESI) for Chemical Communications  
# This journal is © The Royal Society of Chemistry 2005

|    |         |         |         |
|----|---------|---------|---------|
| H  | 0.38662 | 0.30814 | 0.01235 |
| H  | 0.72127 | 0.56788 | 0.14145 |
| H  | 0.55473 | 0.66376 | 0.16576 |
| H  | 0.39907 | 0.76554 | 0.02475 |
| H  | 0.44844 | 0.72486 | 0.90316 |
| H  | 0.25997 | 0.54679 | 0.03426 |
| H  | 0.29665 | 0.51500 | 0.90945 |
| H  | 0.59133 | 0.34604 | 0.13761 |
| H  | 0.42489 | 0.44005 | 0.16836 |
| H  | 0.68540 | 0.58508 | 0.87012 |
| H  | 0.79244 | 0.51339 | 0.96989 |
| H  | 0.64805 | 0.29839 | 0.96207 |
| H  | 0.53471 | 0.37391 | 0.86666 |
| F  | 0.99594 | 0.99775 | 0.99311 |
| F  | 0.53664 | 0.50738 | 0.51143 |
| O2 | 0.37280 | 0.08469 | 0.17463 |
| O2 | 0.61488 | 0.91755 | 0.17736 |
| O2 | 0.91074 | 0.37736 | 0.16453 |
| O2 | 0.07921 | 0.62142 | 0.16932 |
| O2 | 0.59815 | 0.90877 | 0.81463 |
| O2 | 0.36100 | 0.08164 | 0.81020 |
| O2 | 0.06672 | 0.61721 | 0.81439 |
| O2 | 0.90204 | 0.37392 | 0.80824 |
| O3 | 0.86637 | 0.58422 | 0.67252 |
| O2 | 0.10791 | 0.41609 | 0.67475 |
| O2 | 0.38571 | 0.87848 | 0.67307 |
| O2 | 0.56515 | 0.10699 | 0.67251 |
| O2 | 0.11152 | 0.41605 | 0.30846 |
| O2 | 0.86705 | 0.58115 | 0.29655 |
| O2 | 0.57639 | 0.12223 | 0.31509 |
| O2 | 0.41183 | 0.87935 | 0.31327 |
| O2 | 0.29213 | 0.06368 | 0.99186 |
| O2 | 0.68780 | 0.94555 | 0.99294 |
| O2 | 0.91698 | 0.29045 | 0.98770 |
| O2 | 0.05945 | 0.70198 | 0.99248 |
| O3 | 0.81458 | 0.56861 | 0.48405 |
| O2 | 0.19785 | 0.44802 | 0.49158 |
| O2 | 0.42158 | 0.79079 | 0.49246 |
| O2 | 0.56640 | 0.20501 | 0.49552 |
| O2 | 0.17601 | 0.88338 | 0.13380 |
| O2 | 0.81387 | 0.11351 | 0.13402 |
| O2 | 0.11430 | 0.18391 | 0.12875 |
| O2 | 0.87369 | 0.81774 | 0.13173 |
| O2 | 0.80459 | 0.10898 | 0.84671 |
| O2 | 0.16542 | 0.88063 | 0.85015 |
| O2 | 0.86434 | 0.81473 | 0.85424 |
| O2 | 0.10360 | 0.17708 | 0.84950 |
| O3 | 0.67795 | 0.36433 | 0.64489 |
| O2 | 0.31475 | 0.60898 | 0.63404 |
| O3 | 0.60691 | 0.70214 | 0.63943 |
| O2 | 0.37466 | 0.31816 | 0.63046 |
| O2 | 0.32139 | 0.61049 | 0.35108 |
| O2 | 0.67375 | 0.38519 | 0.35450 |
| O2 | 0.37680 | 0.32133 | 0.35958 |
| O2 | 0.61488 | 0.68184 | 0.35582 |

---

**Table S3.** Cell parameters and atomic coordinates of the optimised cell AST zeolite framework type of composition [DABCOH,F]<sub>2</sub>-Ge<sub>20</sub>O<sub>40</sub>, where DABCOH is protonated 1,4-diazabicyclo [2.2.2] octane. The forcefield in [14] was used for the optimisation. C2 is secondary carbon, N3 is tertiary nitrogen and N4 is quaternary nitrogen. O1 is oxygen in Ge-O-Ge bridges.

---

| CELL PARAMETERS |          |          |           |           |           |           |
|-----------------|----------|----------|-----------|-----------|-----------|-----------|
|                 | 9.314092 | 9.091654 | 14.330846 | 91.193881 | 90.431706 | 88.892181 |
| ATOM            | X        | Y        | Z         |           |           |           |
| Ge1             | 0.22763  | 0.05076  | 0.10271   |           |           |           |
| Ge1             | 0.74714  | 0.92872  | 0.09896   |           |           |           |
| Ge1             | 0.92378  | 0.22958  | 0.10058   |           |           |           |
| Ge1             | 0.05323  | 0.75183  | 0.10022   |           |           |           |
| Ge1             | 0.75563  | 0.93509  | 0.87480   |           |           |           |
| Ge1             | 0.22992  | 0.05454  | 0.87794   |           |           |           |
| Ge1             | 0.05095  | 0.77140  | 0.88344   |           |           |           |
| Ge1             | 0.93271  | 0.23459  | 0.87475   |           |           |           |
| Ge1             | 0.72763  | 0.55076  | 0.60271   |           |           |           |
| Ge1             | 0.24714  | 0.42872  | 0.59897   |           |           |           |
| Ge1             | 0.42378  | 0.72958  | 0.60058   |           |           |           |
| Ge1             | 0.55323  | 0.25183  | 0.60021   |           |           |           |
| Ge1             | 0.25563  | 0.43509  | 0.37481   |           |           |           |
| Ge1             | 0.72991  | 0.55453  | 0.37794   |           |           |           |
| Ge1             | 0.55095  | 0.27139  | 0.38343   |           |           |           |
| Ge1             | 0.43270  | 0.73459  | 0.37475   |           |           |           |
| Ge2             | 0.49314  | 0.00461  | 0.24197   |           |           |           |
| Ge2             | 0.98939  | 0.49555  | 0.24142   |           |           |           |
| Ge2             | 0.48939  | 0.99555  | 0.74142   |           |           |           |
| Ge2             | 0.99314  | 0.50462  | 0.74198   |           |           |           |
| C2              | 0.03670  | 0.93767  | 0.55601   |           |           |           |
| N3              | 0.08233  | 0.07775  | 0.51204   |           |           |           |
| C2              | 0.95243  | 0.16561  | 0.48097   |           |           |           |
| C2              | 0.86570  | 0.07366  | 0.41027   |           |           |           |
| N4              | 0.93993  | 0.92698  | 0.39232   |           |           |           |
| C2              | 0.95094  | 0.84793  | 0.48387   |           |           |           |
| C2              | 0.17505  | 0.04175  | 0.42894   |           |           |           |
| C2              | 0.08884  | 0.95308  | 0.35639   |           |           |           |
| H               | 0.88205  | 0.86465  | 0.34337   |           |           |           |
| H               | 0.13114  | 0.87498  | 0.58045   |           |           |           |
| H               | 0.97192  | 0.96372  | 0.61815   |           |           |           |
| H               | 0.88723  | 0.19899  | 0.54163   |           |           |           |
| H               | 0.98721  | 0.26751  | 0.44887   |           |           |           |
| H               | 0.75844  | 0.05345  | 0.43767   |           |           |           |
| H               | 0.85081  | 0.13398  | 0.34508   |           |           |           |
| H               | 0.99909  | 0.73749  | 0.47376   |           |           |           |
| H               | 0.84256  | 0.83428  | 0.51104   |           |           |           |
| H               | 0.21118  | 0.14338  | 0.39798   |           |           |           |
| H               | 0.27258  | 0.98269  | 0.45149   |           |           |           |
| H               | 0.14322  | 0.84772  | 0.33976   |           |           |           |
| H               | 0.08123  | 0.01444  | 0.29133   |           |           |           |
| C2              | 0.53669  | 0.43778  | 0.05605   |           |           |           |
| N3              | 0.58233  | 0.57781  | 0.01202   |           |           |           |
| C2              | 0.45243  | 0.66565  | 0.98093   |           |           |           |
| C2              | 0.36569  | 0.57363  | 0.91027   |           |           |           |
| N4              | 0.43993  | 0.42695  | 0.89236   |           |           |           |
| C2              | 0.45096  | 0.34796  | 0.98393   |           |           |           |
| C2              | 0.67505  | 0.54174  | 0.92894   |           |           |           |
| C2              | 0.58883  | 0.45303  | 0.85641   |           |           |           |

# Supplementary Material (ESI) for Chemical Communications  
# This journal is © The Royal Society of Chemistry 2005

|    |         |         |         |
|----|---------|---------|---------|
| H  | 0.38205 | 0.36459 | 0.84343 |
| H  | 0.63113 | 0.37511 | 0.08053 |
| H  | 0.47190 | 0.46389 | 0.11816 |
| H  | 0.38724 | 0.69909 | 0.04157 |
| H  | 0.48722 | 0.76751 | 0.94878 |
| H  | 0.25845 | 0.55344 | 0.93769 |
| H  | 0.35078 | 0.63390 | 0.84506 |
| H  | 0.49914 | 0.23753 | 0.97385 |
| H  | 0.34258 | 0.33429 | 0.01110 |
| H  | 0.71121 | 0.64333 | 0.89794 |
| H  | 0.77257 | 0.48268 | 0.95151 |
| H  | 0.64321 | 0.34767 | 0.83980 |
| H  | 0.58121 | 0.51436 | 0.79134 |
| F  | 0.99990 | 0.96410 | 0.96904 |
| F  | 0.49988 | 0.46411 | 0.46904 |
| O1 | 0.37207 | 0.09651 | 0.17071 |
| O1 | 0.60376 | 0.89996 | 0.16883 |
| O1 | 0.88867 | 0.38196 | 0.17042 |
| O1 | 0.08883 | 0.60795 | 0.17332 |
| O1 | 0.60500 | 0.89441 | 0.80940 |
| O1 | 0.38054 | 0.09729 | 0.81592 |
| O1 | 0.09302 | 0.61548 | 0.81098 |
| O1 | 0.89356 | 0.38824 | 0.81082 |
| O1 | 0.87207 | 0.59652 | 0.67071 |
| O1 | 0.10376 | 0.39997 | 0.66883 |
| O1 | 0.38867 | 0.88196 | 0.67042 |
| O1 | 0.58883 | 0.10795 | 0.67331 |
| O1 | 0.10499 | 0.39442 | 0.30941 |
| O1 | 0.88053 | 0.59729 | 0.31592 |
| O1 | 0.59301 | 0.11547 | 0.31097 |
| O1 | 0.39355 | 0.88823 | 0.31082 |
| O1 | 0.27504 | 0.10117 | 0.99193 |
| O1 | 0.70201 | 0.88943 | 0.98524 |
| O1 | 0.94351 | 0.29352 | 0.98941 |
| O1 | 0.05437 | 0.67981 | 0.98884 |
| O1 | 0.77503 | 0.60117 | 0.49193 |
| O1 | 0.20201 | 0.38942 | 0.48525 |
| O1 | 0.44351 | 0.79352 | 0.48941 |
| O1 | 0.55436 | 0.17982 | 0.48884 |
| O1 | 0.19916 | 0.86582 | 0.11427 |
| O1 | 0.77999 | 0.11726 | 0.10691 |
| O1 | 0.07975 | 0.14869 | 0.14261 |
| O1 | 0.89354 | 0.82941 | 0.13899 |
| O1 | 0.78867 | 0.11927 | 0.85958 |
| O1 | 0.20443 | 0.86926 | 0.85858 |
| O1 | 0.88472 | 0.81250 | 0.83368 |
| O1 | 0.09370 | 0.16471 | 0.83481 |
| O1 | 0.69916 | 0.36582 | 0.61427 |
| O1 | 0.27999 | 0.61726 | 0.60691 |
| O1 | 0.57975 | 0.64868 | 0.64261 |
| O1 | 0.39354 | 0.32942 | 0.63899 |
| O1 | 0.28865 | 0.61927 | 0.35958 |
| O1 | 0.70442 | 0.36925 | 0.35858 |
| O1 | 0.38471 | 0.31250 | 0.33368 |
| O1 | 0.59369 | 0.66471 | 0.33481 |

---
